# Supplementary material
Source: Frontiers journal article supplement (https://www.frontiersin.org/articles/346009)
Supplement: Presentation_1.PDF [file Presentation_1.PDF]

# Trio Clinical Exome Sequencing in a Patient with Multicentric Carpotarsal Osteolysis Syndrome: First Case Report in the Balkans

Aleksandra Stajkovska<sup>2</sup>, Sanja Mehandziska<sup>1</sup>, Margarita Stavrevska<sup>2</sup>, Kristina Jakovleva<sup>1</sup>, Natasha Nikchevska<sup>1</sup>, Zan Mitrev<sup>1</sup>, Ivan Kungulovski<sup>2</sup>, Gjorgje Zafiroski<sup>4</sup>, Velibor Tasic<sup>3</sup>, Goran Kungulovski<sup>2\*</sup>

<sup>1</sup>Zan Mitrev Clinic, Skopje, Republic of Macedonia; <sup>2</sup>Bio Engineering LLC, Skopje, Republic of Macedonia, <sup>3</sup>Department of Pediatric Nephrology, University Children's Hospital, Medical Faculty of Skopje, Republic of Macedonia, <sup>4</sup>Neuromedica Hospital, Republic of Macedonia

*\*Corresponding author:*

*Dr. Goran Kungulovski, Bio Engineering LLC, Laboratory of Genetics and Personalized Medicine, Zan Mitrev Clinic*

*Ivan Agovski 7-1, 1000, Skopje, Republic of Macedonia*

*Phone: +389 70 234280*

[goran@bioengineering.mk](mailto:goran@bioengineering.mk)

[goran.kungulovski@zmc.mk](mailto:goran.kungulovski@zmc.mk)

# Supplementary Material

A

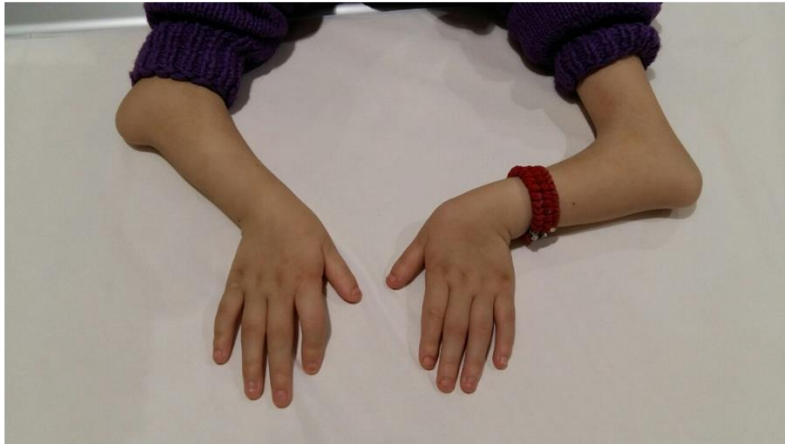

B

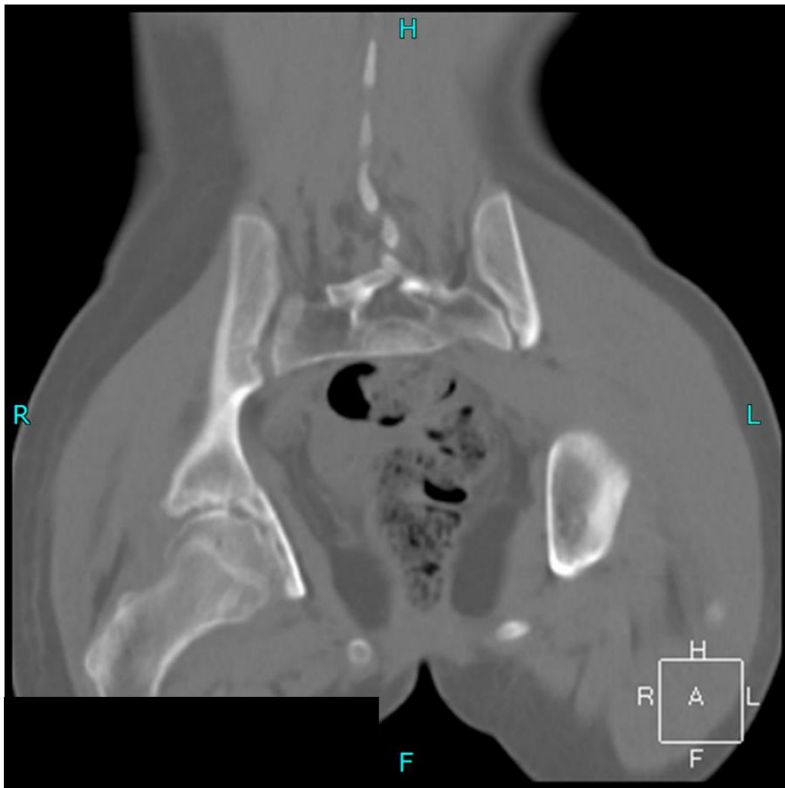

**Supplementary Figure 1.** Assessment of the clinical symptoms of the patient. A) Appearance of palms, hands and elbows of the patient. B) Computed tomography scan (CT) showing spina bifida and cyst-like structures on the right femoral epiphysis due to osteolysis.

**A**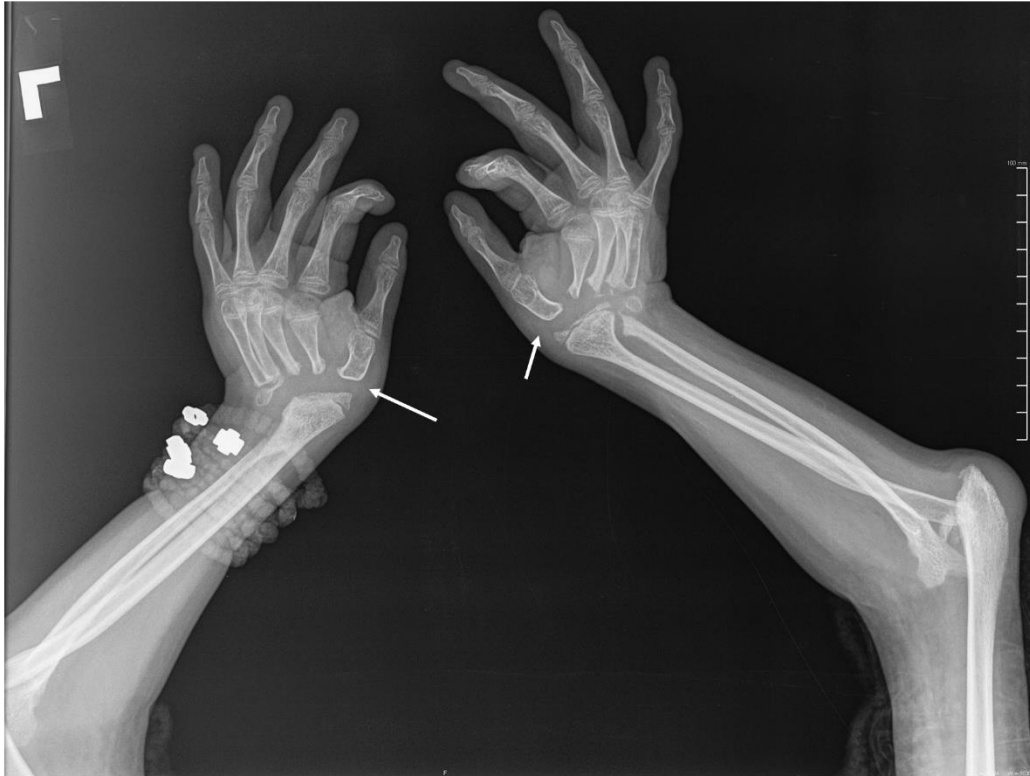**B**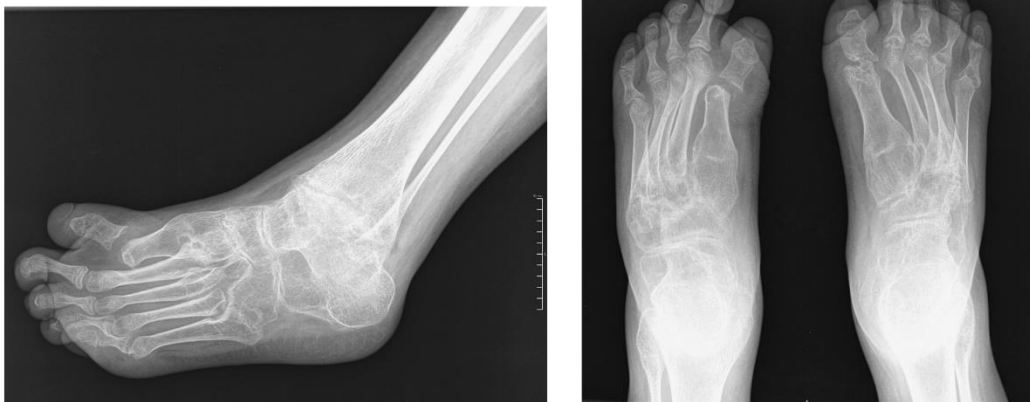

**Supplementary Figure 2.** Assessment of the clinical symptoms of the patient. A) X-ray image illustrating destruction of carpal bones. Absence of carpal bones, osteolysis of proximal end of metacarpal bones, and bones of the elbow joints with pathological dislocation of the elbow joints. B) X-ray image of feet illustrating tarsal osteolysis and metatarsals primus with pathological dislocation of the metatarsophalangeal joint of both halluxes.

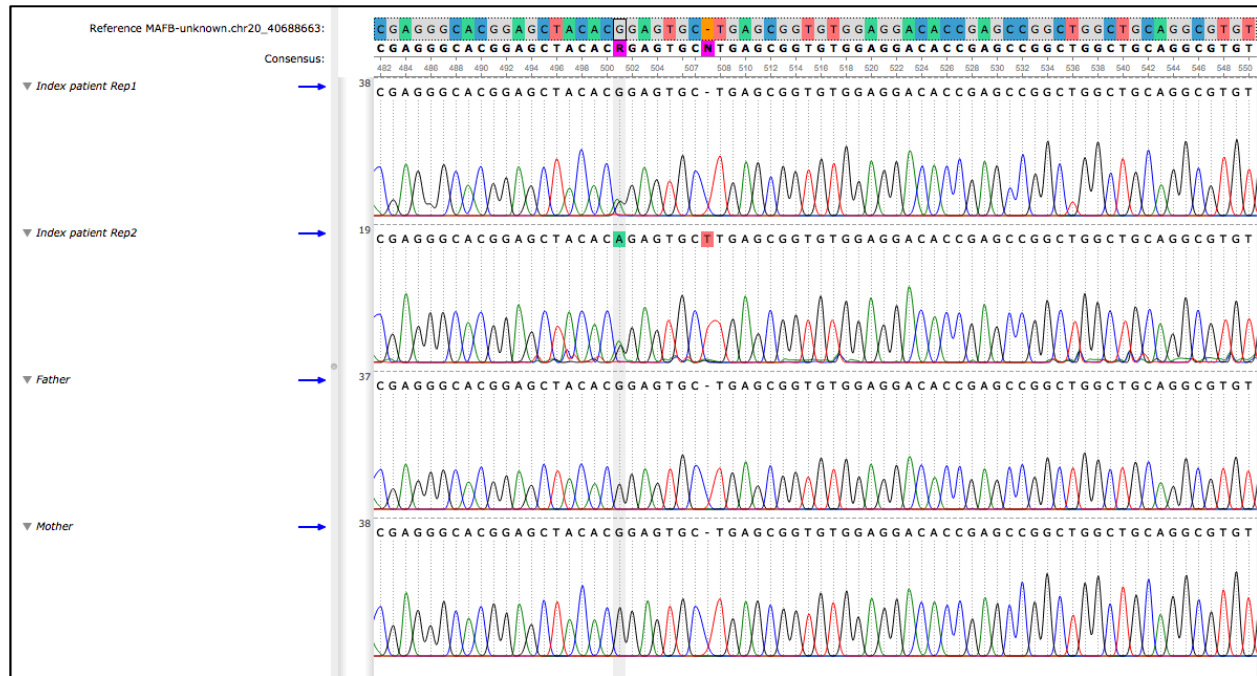

**Supplementary Figure 3.** Sanger sequencing of *MAFB* gene. Confirmation of c.188C>T (p.Pro63Leu) in the *MAFB* gene. Heterozygous presence of the c.188C>T (herein G>A) variant was confirmed in the patient, while no mutation (CC genotype) was detected in her mother and father.

**Supplementary Table 1.** A list of heterozygous candidate variants based on ACMG computational criteria found by singleton clinical exome sequencing.

| Carriers       | Gene    | Type | Coding consequence | Chrom. | Genomic position | Coverage (proband) | Zygosity | c.DNA     | Protein      | dbSNP       | g1000   | esp5400 | id_clinvar |
|----------------|---------|------|--------------------|--------|------------------|--------------------|----------|-----------|--------------|-------------|---------|---------|------------|
| Proband        | MAFB    | SNP  | missense           | 20     | 39317302         | 168                | Het      | c.188C>T  | p.Pro63Leu   | /           | /       | /       | /          |
| Proband/Father | COL9A3  | SNP  | missense           | 20     | 61470100         | 75                 | Het      | c.1851C>A | p.Asp617Glu  | rs199577452 | 0.0002  | 0.00005 |            |
| Proband/Mother | MATN3   | SNP  | missense           | 2      | 20202930         | 108                | Het      | c.908C>T  | p.Thr303Met  | rs77245812  | 0.014   | 0.0161  | rs77245812 |
| Proband/Father | COL10A1 | SNP  | missense           | 6      | 116442542        | 263                | Het      | c.737T>C  | p.Ile246Thr  | rs764388204 | 0.00005 | /       |            |
| Proband/Mother | COL11A1 | SNP  | missense           | 1      | 103453270        | 170                | Het      | c.2304A>T | p.Arg768Ser  | rs367824632 | /       | 0.0002  |            |
| Proband/Father | COL11A1 | SNP  | missense           | 1      | 103491461        | 45                 | Het      | c.828A>C  | p.Lys276Asn  | rs12731843  | 0.0793  | 0.0712  |            |
| Proband/Father | COL18A1 | SNP  | missense           | 21     | 46875961         | 21                 | Het      | c.517G>A  | p.Gly173Ser  | rs62000960  | 0.0016  | 0.0031  | rs62000960 |
| Proband/Father | SMAD1   | SNP  | missense           | 4      | 146460967        | 43                 | Het      | c.412G>T  | p.Val138Leu  | rs371393906 | /       | 0.00002 |            |
| Proband/Father | LTBP1   | SNP  | missense           | 2      | 33500098         | 120                | Het      | c.2810G>A | p.Ser937Asn  | rs752887751 | /       | 0.00008 |            |
| Proband/Father | BMP2K   | SNP  | missense           | 4      | 79831772         | 23                 | Het      | c.2071G>A | p.Glu691Lys  | rs182929460 | 0.0018  | 0.0048  |            |
| Proband/Father | FLNA    | SNP  | missense           | X      | 153578543        | 211                | Het      | c.7189A>G | p.Asn2397Asp |             | /       | /       |            |
| Proband/Father | GC      | SNP  | no-start           | 4      | 72669661         | 124                | Het      | c.3G>T    | p.Met1?      | rs76781122  | 0.0134  | 0.0172  |            |

**Supplementary Table 2.** The c.188C>T variant in the MAFB gene meets numerous computational criteria of pathogenicity.

| Carriers | Gene | Type | Coding consequence | Chrom. | Genomic position | Coverage (proband) | Zygosity | c.DNA    | Protein    | dbSNP | g1000 | GERP | DANN   | Mutation Taster | SIFT     | FATHMM   | MetaSVM  |
|----------|------|------|--------------------|--------|------------------|--------------------|----------|----------|------------|-------|-------|------|--------|-----------------|----------|----------|----------|
| Proband  | MAFB | SNP  | missense           | 20     | 39317302         | 168                | Het      | c.188C>T | p.Pro63Leu | /     | /     | 4.61 | 0.9982 | Damaging        | Damaging | Damaging | Damaging |
